# Supplementary material
Source: Springer Nature journal article supplement (https://www.springermedizin.de/resource/supplementary/12885_2012_3804_MOESM11_ESM.pdf/9464500)

**ALDH-1****Fold****3,5**  
**3**  
**2,5**  
**2**  
**1,5**  
**1**  
**0,5**  
**0****CPA-****2xCPA****CPA-****2xCPA****6xCPA****HUH-PAS****HUH-REISO****\*\*****\***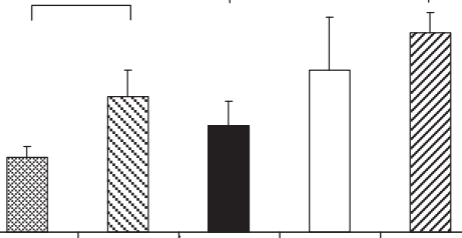

Supplement: MOESM11 [file 9464500]
